# Supplementary material
Source: Springer Nature journal article supplement (https://www.springermedizin.de/resource/supplementary/12955_2011_970_MOESM6_ESM.pdf/9558886)

**Figure 4.** Scoring (in proportions) of the EQ-5 sub-domains at baseline and 12-month follow-up (n = 67).

Differences between the two time points are analysed using chi-square and Fisher's exact tests.

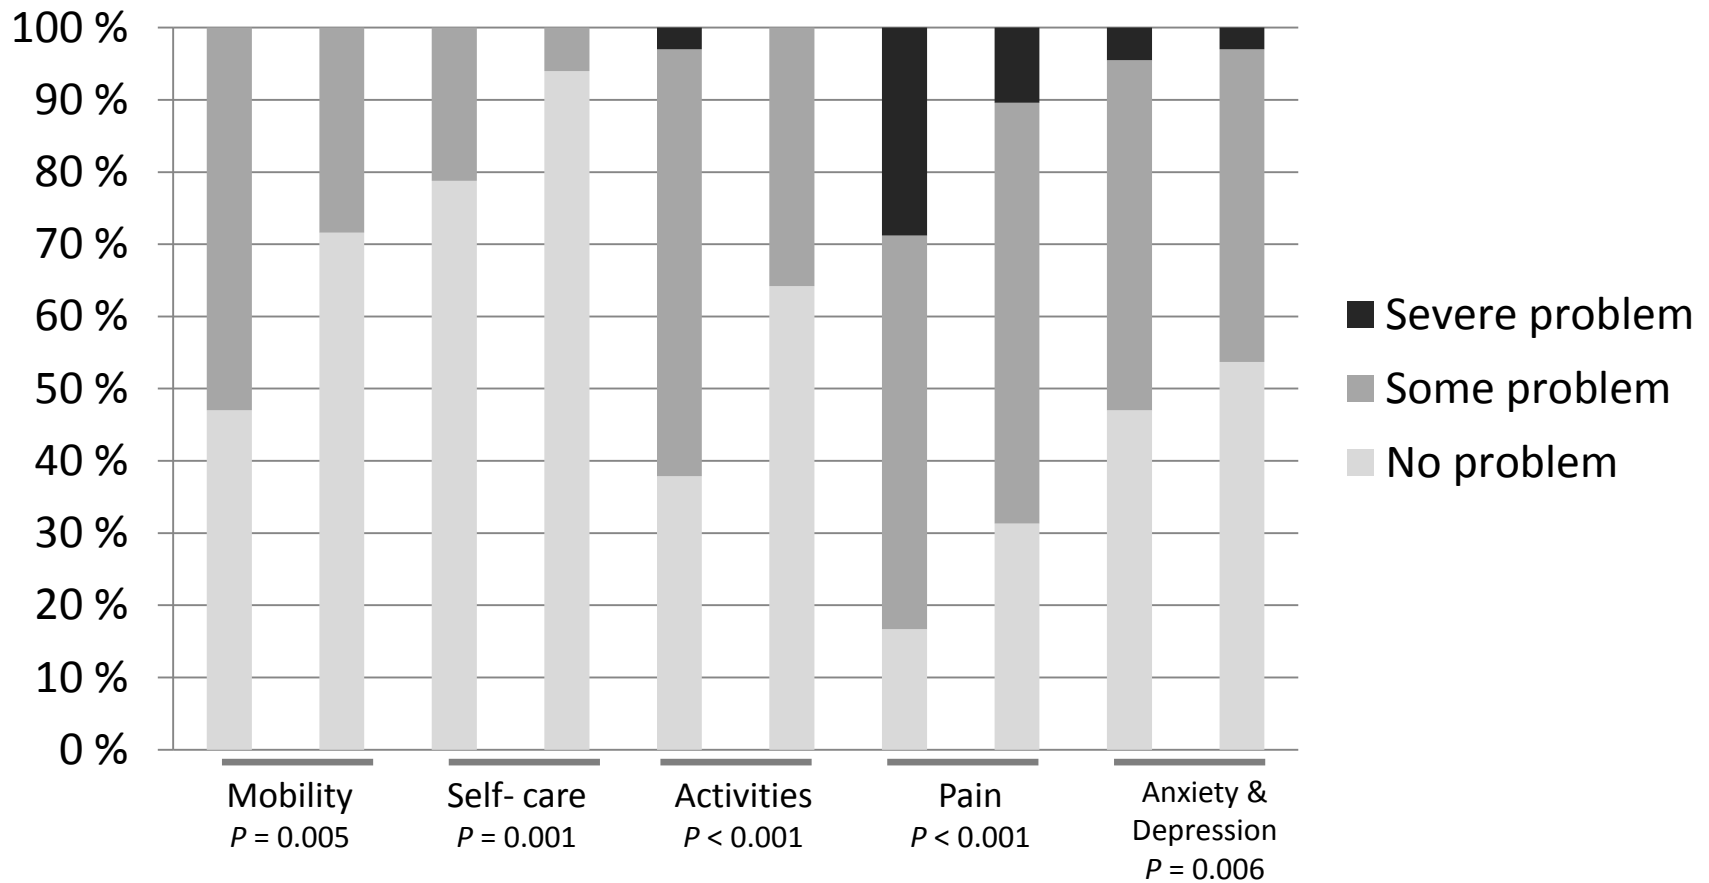

Supplement: MOESM6 [file 9558886]
